# Supplementary material for: Fragmenta chorologica occidentalia, 5551-5577
Source: MDPI journal article supplement (doi:10.3390/metabo13020138), 1995-01-01
Supplement: s1 [file s1]

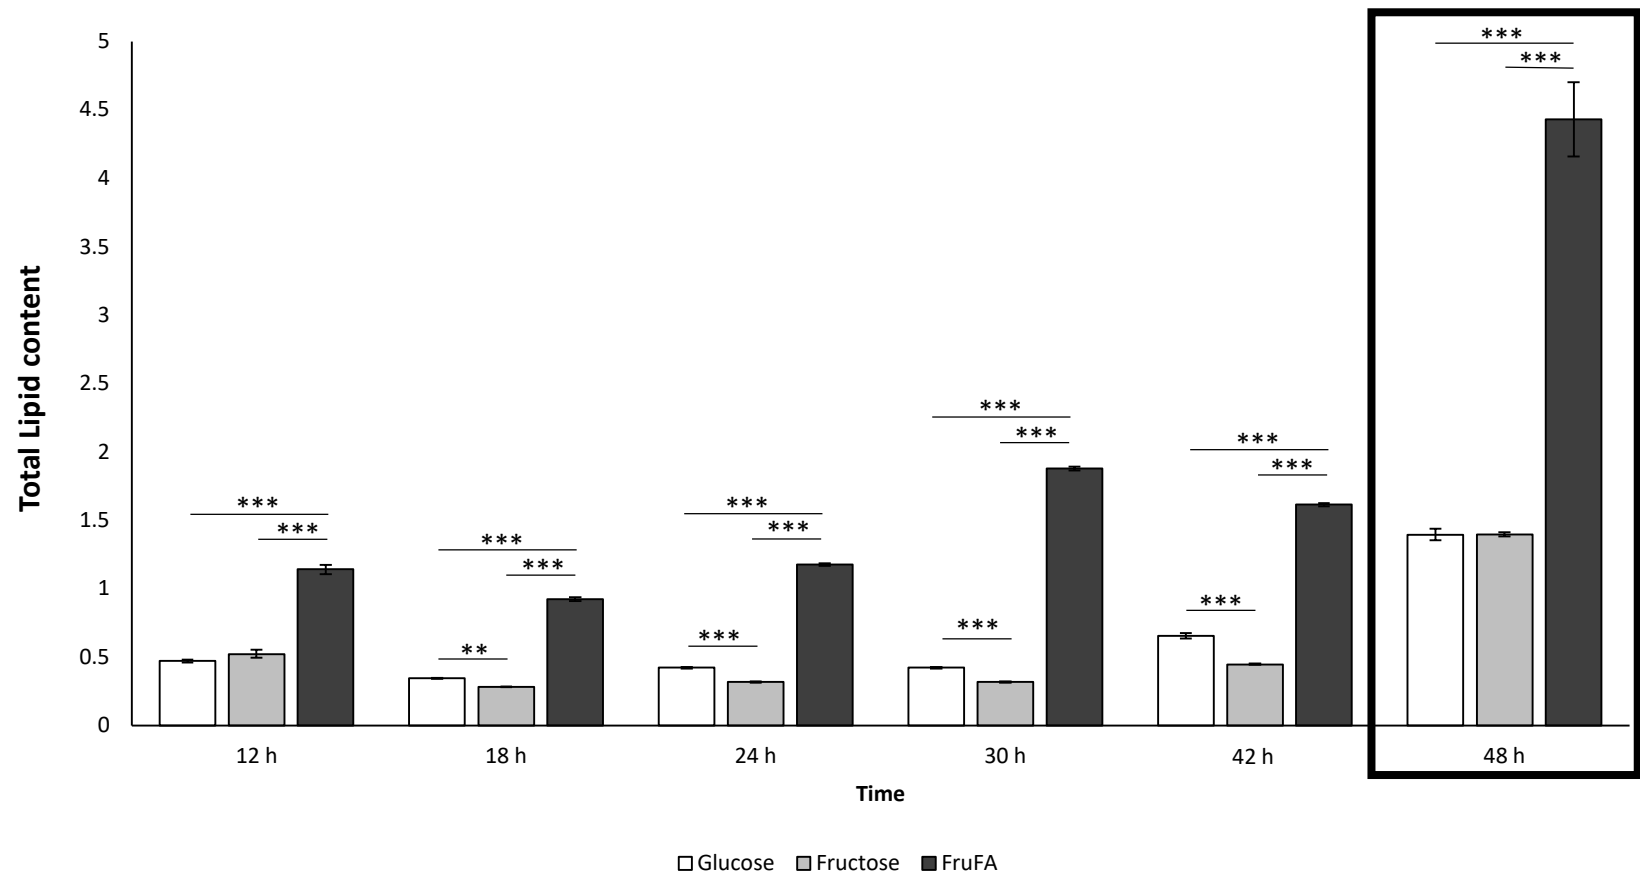

**Figure S1: Effect of fructose and fructose-induced steatosis on lipid content in AML-12 hepatocytes.** Relative lipid content after 12-48 h in AML-12 hepatocytes. Asterisk denote significant differences by Tukey HSD (\*p<0.05, \*\*p<0.01, \*\*\*p<0.0001).

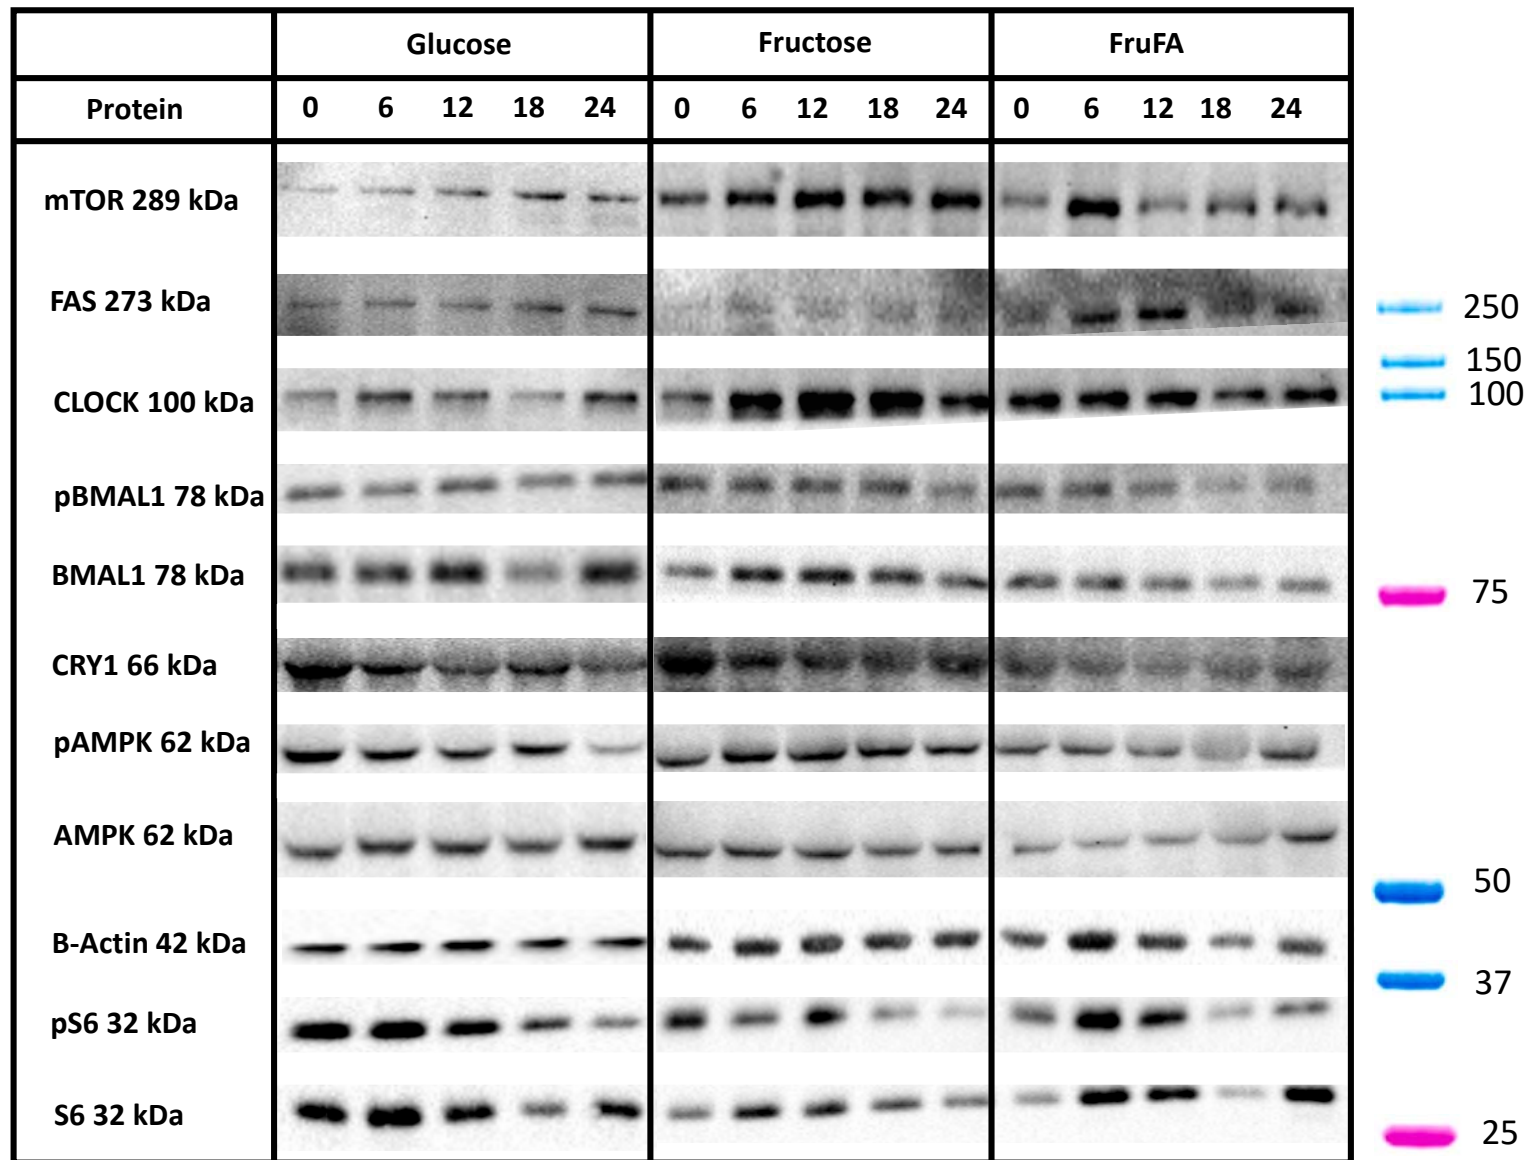

**Figure S2: Western blots Effect of glucose, fructose and FruFA on protein levels in AML-12 hepatocytes.** Each protein was measured in 5 time-points throughout the circadian

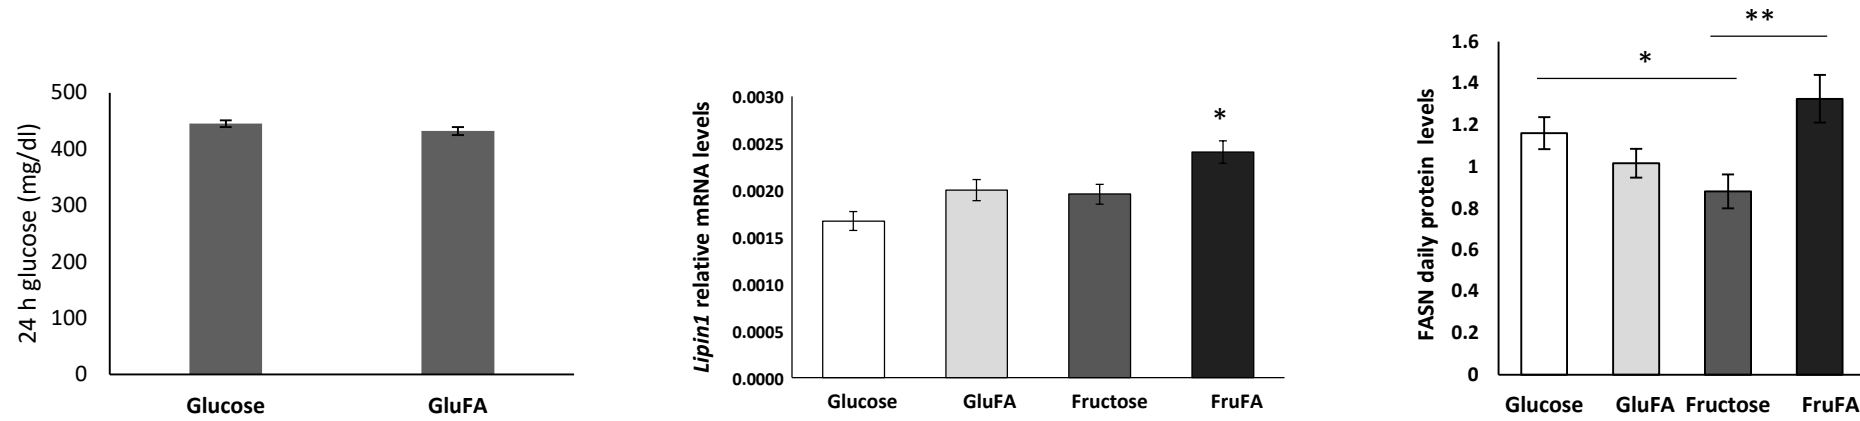

**Figure S3:** Effect of glucose/fructose and fatty acids on 24 h glucose levels and lipid synthesis. Asterisk denote significant differences by Tukey HSD (\* $p < 0.05$ , \*\* $p < 0.01$ ).

**Supplementary Table S1: Quantitative real-time PCR primer sequences**

| <b>Gene</b>    | <b>Forward primer</b>          | <b>Reverse primer</b>            |
|----------------|--------------------------------|----------------------------------|
| <i>Actin</i>   | 5'-CTAAGGCCAACCGTGAAAAG-3'     | 5'-GGGGTGTGTAAGGTCTCAAA-3'       |
| <i>Tnfa</i>    | 5'-ATGAGAAGTTCCCAAATGGCC-3'    | 5'-GGGTCTGGGCCATAGAACTGA-3'      |
| <i>Lipin1</i>  | 5'-ATGCCAAGACCAACATCAGCT-3'    | 5'-GATCGACCACTTCGCAGAGC-3'       |
| <i>R-age</i>   | 5'-CTACCTATTCCTGCAGCTTC-3'     | 5'-CTGATGTTGACAGGAGGGCTTTCC-3'   |
| <i>Rora</i>    | 5'-CAGAAATGCCTGGCCGTG-3'       | 5'-CCGACCAAACCTTGACAGCATC-3'     |
| <i>RevErba</i> | 5'-GGGCACAAGCAACATTACCAA-3'    | 5'-CACCTTACACAGTAGCACCATGC-3'    |
| <i>Bmal1</i>   | 5'-CAAGAATGCAAGGGAGGCC-3'      | 5'-TTGTCCCGACGCCTCTTTT-3'        |
| <i>Clock</i>   | 5'-CCTAGAAAATCTGGCAAAATGTCA-3' | 5'-CCTTTTCCATATTGCATTAAGTGCT-3'  |
| <i>Cry1</i>    | 5'-AGGCAGCTGATGTATTTCCCA-3'    | 5'-AGTTTAGTGATGTTCCATTCCTTGAA-3' |
| <i>Per1</i>    | 5'-CCGAATACACACTTCGAAACCAG-3'  | 5'-TCCCGTTTGCAACGCAG-3'          |
